# Supplementary material for: Evaluation of Short-Season Soybean Genotypes for Resistance and Partial Resistance to Phytophthora sojae
Source: MDPI journal article supplement (doi:10.3390/ijms24076027), 2023-03-23
Supplement: s1 [file s1]

**Table S1.** Reaction pattern of 112 soybean cultivars to 12 *P. sojae* strains

| Germplasm                 | Reaction pattern                                                                                                                                                                       | Resistance gene ( <i>RPS</i> )                                                      |
|---------------------------|----------------------------------------------------------------------------------------------------------------------------------------------------------------------------------------|-------------------------------------------------------------------------------------|
| Mengdou 28, Kejiao 10-262 | R <sub>1</sub> R <sub>2</sub> R <sub>3</sub> R <sub>4</sub> R <sub>5</sub> R <sub>6</sub> R <sub>7</sub> R <sub>8</sub> S <sub>9</sub> R <sub>10</sub> R <sub>11</sub> R <sub>12</sub> | 3a, 1a+3a, 1a+1b, 1b+1c,<br>1b+1d, 1b+3a, 1b+6, 1c+1d,<br>1c+3a, 1d+1k, 1d+3a, 1d+6 |
| Heinong 53                | S <sub>1</sub> S <sub>2</sub> S <sub>3</sub> S <sub>4</sub> S <sub>5</sub> R <sub>6</sub> S <sub>7</sub> S <sub>8</sub> S <sub>9</sub> S <sub>10</sub> S <sub>11</sub> S <sub>12</sub> |                                                                                     |
| Suinong 28, Henong 60     | S <sub>1</sub> S <sub>2</sub> S <sub>3</sub> S <sub>4</sub> S <sub>5</sub> S <sub>6</sub> S <sub>7</sub> S <sub>8</sub> S <sub>9</sub> S <sub>10</sub> S <sub>11</sub> S <sub>12</sub> |                                                                                     |
| Kendou 6, Dongnong 4400   | S <sub>1</sub> S <sub>2</sub> S <sub>3</sub> S <sub>4</sub> S <sub>5</sub> S <sub>6</sub> S <sub>7</sub> S <sub>8</sub> R <sub>9</sub> R <sub>10</sub> S <sub>11</sub> S <sub>12</sub> |                                                                                     |
| Heihe 35                  | S <sub>1</sub> S <sub>2</sub> S <sub>3</sub> S <sub>4</sub> S <sub>5</sub> R <sub>6</sub> S <sub>7</sub> R <sub>8</sub> S <sub>9</sub> S <sub>10</sub> S <sub>11</sub> S <sub>12</sub> |                                                                                     |
| Heinong 46                | S <sub>1</sub> S <sub>2</sub> S <sub>3</sub> S <sub>4</sub> S <sub>5</sub> R <sub>6</sub> S <sub>7</sub> R <sub>8</sub> R <sub>9</sub> R <sub>10</sub> S <sub>11</sub> R <sub>12</sub> |                                                                                     |
| Heinong 56                | S <sub>1</sub> S <sub>2</sub> S <sub>3</sub> S <sub>4</sub> S <sub>5</sub> R <sub>6</sub> S <sub>7</sub> R <sub>8</sub> R <sub>9</sub> R <sub>10</sub> S <sub>11</sub> S <sub>12</sub> |                                                                                     |
| Jiyu 97                   | S <sub>1</sub> S <sub>2</sub> S <sub>3</sub> S <sub>4</sub> S <sub>5</sub> R <sub>6</sub> S <sub>7</sub> R <sub>8</sub> S <sub>9</sub> R <sub>10</sub> S <sub>11</sub> S <sub>12</sub> |                                                                                     |
| Heinong 58                | S <sub>1</sub> S <sub>2</sub> S <sub>3</sub> S <sub>4</sub> S <sub>5</sub> R <sub>6</sub> R <sub>7</sub> R <sub>8</sub> R <sub>9</sub> R <sub>10</sub> S <sub>11</sub> S <sub>12</sub> |                                                                                     |
| Hefeng 37, Hefeng 51      | S <sub>1</sub> S <sub>2</sub> S <sub>3</sub> S <sub>4</sub> S <sub>5</sub> S <sub>6</sub> S <sub>7</sub> S <sub>8</sub> R <sub>9</sub> S <sub>10</sub> S <sub>11</sub> S <sub>12</sub> |                                                                                     |
| Suinong 23                | S <sub>1</sub> S <sub>2</sub> S <sub>3</sub> S <sub>4</sub> S <sub>5</sub> S <sub>6</sub> R <sub>7</sub> R <sub>8</sub> S <sub>9</sub> R <sub>10</sub> R <sub>11</sub> R <sub>12</sub> |                                                                                     |
| Heihe 52                  | S <sub>1</sub> S <sub>2</sub> S <sub>3</sub> S <sub>4</sub> R <sub>5</sub> S <sub>6</sub> S <sub>7</sub> S <sub>8</sub> R <sub>9</sub> R <sub>10</sub> S <sub>11</sub> S <sub>12</sub> |                                                                                     |
| Kenfeng 16                | S <sub>1</sub> S <sub>2</sub> S <sub>3</sub> S <sub>4</sub> R <sub>5</sub> R <sub>6</sub> S <sub>7</sub> R <sub>8</sub> R <sub>9</sub> S <sub>10</sub> S <sub>11</sub> S <sub>12</sub> |                                                                                     |
| Hefeng 45                 | S <sub>1</sub> S <sub>2</sub> R <sub>3</sub> S <sub>4</sub> S <sub>5</sub> R <sub>6</sub> R <sub>7</sub> S <sub>8</sub> S <sub>9</sub> S <sub>10</sub> S <sub>11</sub> S <sub>12</sub> |                                                                                     |
| Hefeng 55                 | S <sub>1</sub> S <sub>2</sub> R <sub>3</sub> S <sub>4</sub> S <sub>5</sub> S <sub>6</sub> S <sub>7</sub> R <sub>8</sub> S <sub>9</sub> S <sub>10</sub> S <sub>11</sub> S <sub>12</sub> |                                                                                     |
| Heinong 37                | R <sub>1</sub> S <sub>2</sub> S <sub>3</sub> R <sub>4</sub> S <sub>5</sub> R <sub>6</sub> S <sub>7</sub> R <sub>8</sub> S <sub>9</sub> R <sub>10</sub> S <sub>11</sub> S <sub>12</sub> |                                                                                     |
| Hefeng 52                 | R <sub>1</sub> S <sub>2</sub> R <sub>3</sub> R <sub>4</sub> R <sub>5</sub> S <sub>6</sub> R <sub>7</sub> R <sub>8</sub> R <sub>9</sub> S <sub>10</sub> S <sub>11</sub> S <sub>12</sub> |                                                                                     |
| Heihe 27                  | S <sub>1</sub> S <sub>2</sub> R <sub>3</sub> R <sub>4</sub> S <sub>5</sub> S <sub>6</sub> S <sub>7</sub> R <sub>8</sub> R <sub>9</sub> R <sub>10</sub> S <sub>11</sub> S <sub>12</sub> |                                                                                     |
| Mengdou 12                | S <sub>1</sub> S <sub>2</sub> R <sub>3</sub> S <sub>4</sub> R <sub>5</sub> S <sub>6</sub> S <sub>7</sub> S <sub>8</sub> S <sub>9</sub> S <sub>10</sub> S <sub>11</sub> S <sub>12</sub> |                                                                                     |
| Hefeng 54                 | S <sub>1</sub> R <sub>2</sub> S <sub>3</sub> S <sub>4</sub> R <sub>5</sub> S <sub>6</sub> S <sub>7</sub> S <sub>8</sub> S <sub>9</sub> S <sub>10</sub> S <sub>11</sub> S <sub>12</sub> |                                                                                     |
| Mengdou 31                | S <sub>1</sub> R <sub>2</sub> R <sub>3</sub> S <sub>4</sub> R <sub>5</sub> S <sub>6</sub> S <sub>7</sub> S <sub>8</sub> S <sub>9</sub> S <sub>10</sub> S <sub>11</sub> S <sub>12</sub> |                                                                                     |
| Suinong 25                | S <sub>1</sub> R <sub>2</sub> S <sub>3</sub> S <sub>4</sub> R <sub>5</sub> S <sub>6</sub> S <sub>7</sub> R <sub>8</sub> S <sub>9</sub> R <sub>10</sub> S <sub>11</sub> S <sub>12</sub> |                                                                                     |
| Beifeng 11                | S <sub>1</sub> R <sub>2</sub> S <sub>3</sub> R <sub>4</sub> R <sub>5</sub> R <sub>6</sub> R <sub>7</sub> R <sub>8</sub> S <sub>9</sub> R <sub>10</sub> R <sub>11</sub> S <sub>12</sub> |                                                                                     |
| Beidou 42                 | S <sub>1</sub> R <sub>2</sub> R <sub>3</sub> S <sub>4</sub> R <sub>5</sub> R <sub>6</sub> S <sub>7</sub> R <sub>8</sub> R <sub>9</sub> S <sub>10</sub> R <sub>11</sub> R <sub>12</sub> |                                                                                     |
| Suinong 38                | R <sub>1</sub> S <sub>2</sub> S <sub>3</sub> S <sub>4</sub> R <sub>5</sub> S <sub>6</sub> S <sub>7</sub> R <sub>8</sub> R <sub>9</sub> R <sub>10</sub> S <sub>11</sub> S <sub>12</sub> |                                                                                     |
| Heinong 59                | R <sub>1</sub> S <sub>2</sub> S <sub>3</sub> S <sub>4</sub> R <sub>5</sub> S <sub>6</sub> S <sub>7</sub> R <sub>8</sub> S <sub>9</sub> R <sub>10</sub> S <sub>11</sub> S <sub>12</sub> |                                                                                     |
| Heinong 52                | R <sub>1</sub> S <sub>2</sub> S <sub>3</sub> S <sub>4</sub> S <sub>5</sub> S <sub>6</sub> S <sub>7</sub> S <sub>8</sub> R <sub>9</sub> R <sub>10</sub> S <sub>11</sub> S <sub>12</sub> |                                                                                     |
| Suinong 14                | R <sub>1</sub> S <sub>2</sub> S <sub>3</sub> S <sub>4</sub> S <sub>5</sub> R <sub>6</sub> S <sub>7</sub> R <sub>8</sub> S <sub>9</sub> R <sub>10</sub> S <sub>11</sub> S <sub>12</sub> |                                                                                     |
| Suinong 31, Kenjiandou 28 | R <sub>1</sub> S <sub>2</sub> S <sub>3</sub> S <sub>4</sub> R <sub>5</sub> R <sub>6</sub> S <sub>7</sub> R <sub>8</sub> R <sub>9</sub> S <sub>10</sub> S <sub>11</sub> S <sub>12</sub> |                                                                                     |
| Heihe 36                  | R <sub>1</sub> S <sub>2</sub> S <sub>3</sub> S <sub>4</sub> R <sub>5</sub> R <sub>6</sub> S <sub>7</sub> R <sub>8</sub> S <sub>9</sub> R <sub>10</sub> S <sub>11</sub> S <sub>12</sub> |                                                                                     |
| Heihe 53                  | R <sub>1</sub> S <sub>2</sub> S <sub>3</sub> S <sub>4</sub> R <sub>5</sub> R <sub>6</sub> S <sub>7</sub> R <sub>8</sub> R <sub>9</sub> R <sub>10</sub> S <sub>11</sub> S <sub>12</sub> |                                                                                     |
| Heihe 43, Heinong 54      | R <sub>1</sub> S <sub>2</sub> S <sub>3</sub> S <sub>4</sub> R <sub>5</sub> R <sub>6</sub> S <sub>7</sub> R <sub>8</sub> S <sub>9</sub> S <sub>10</sub> S <sub>11</sub> S <sub>12</sub> |                                                                                     |
| Suinong 37                | R <sub>1</sub> S <sub>2</sub> S <sub>3</sub> S <sub>4</sub> R <sub>5</sub> R <sub>6</sub> R <sub>7</sub> R <sub>8</sub> R <sub>9</sub> S <sub>10</sub> S <sub>11</sub> S <sub>12</sub> |                                                                                     |
| Heihe 4                   | R <sub>1</sub> S <sub>2</sub> S <sub>3</sub> S <sub>4</sub> R <sub>5</sub> S <sub>6</sub> R <sub>7</sub> R <sub>8</sub> S <sub>9</sub> R <sub>10</sub> S <sub>11</sub> R <sub>12</sub> |                                                                                     |
| Dengke 1                  | R <sub>1</sub> S <sub>2</sub> R <sub>3</sub> R <sub>4</sub> R <sub>5</sub> R <sub>6</sub> R <sub>7</sub> R <sub>8</sub> R <sub>9</sub> R <sub>10</sub> S <sub>11</sub> S <sub>12</sub> |                                                                                     |
| Kejiao 10-2192            | R <sub>1</sub> S <sub>2</sub> S <sub>3</sub> R <sub>4</sub> R <sub>5</sub> R <sub>6</sub> R <sub>7</sub> R <sub>8</sub> S <sub>9</sub> R <sub>10</sub> S <sub>11</sub> S <sub>12</sub> |                                                                                     |
| Heinong 51                | R <sub>1</sub> S <sub>2</sub> S <sub>3</sub> R <sub>4</sub> R <sub>5</sub> R <sub>6</sub> S <sub>7</sub> R <sub>8</sub> R <sub>9</sub> S <sub>10</sub> S <sub>11</sub> S <sub>12</sub> |                                                                                     |
| Dengke 4                  | R <sub>1</sub> R <sub>2</sub> R <sub>3</sub> R <sub>4</sub> R <sub>5</sub> S <sub>6</sub> R <sub>7</sub> R <sub>8</sub> R <sub>9</sub> R <sub>10</sub> R <sub>11</sub> R <sub>12</sub> |                                                                                     |
| Hefeng 35                 | R <sub>1</sub> S <sub>2</sub> S <sub>3</sub> R <sub>4</sub> R <sub>5</sub> R <sub>6</sub> S <sub>7</sub> S <sub>8</sub> S <sub>9</sub> S <sub>10</sub> S <sub>11</sub> S <sub>12</sub> |                                                                                     |

**Table S1.** (Continued from previous page)

| Germplasm                                                                       | Reaction pattern                                                                                                                                                                       | Resistance gene ( <i>RPS</i> ) |
|---------------------------------------------------------------------------------|----------------------------------------------------------------------------------------------------------------------------------------------------------------------------------------|--------------------------------|
| Hongfeng 3                                                                      | R <sub>1</sub> S <sub>2</sub> S <sub>3</sub> R <sub>4</sub> R <sub>5</sub> S <sub>6</sub> S <sub>7</sub> R <sub>8</sub> S <sub>9</sub> S <sub>10</sub> S <sub>11</sub> R <sub>12</sub> |                                |
| Suinong 24                                                                      | R <sub>1</sub> S <sub>2</sub> R <sub>3</sub> S <sub>4</sub> R <sub>5</sub> S <sub>6</sub> S <sub>7</sub> S <sub>8</sub> S <sub>9</sub> S <sub>10</sub> S <sub>11</sub> S <sub>12</sub> |                                |
| Dengke 10                                                                       | R <sub>1</sub> S <sub>2</sub> S <sub>3</sub> R <sub>4</sub> R <sub>5</sub> R <sub>6</sub> S <sub>7</sub> S <sub>8</sub> R <sub>9</sub> R <sub>10</sub> R <sub>11</sub> R <sub>12</sub> |                                |
| Heihe 22, Kenfeng 22                                                            | R <sub>1</sub> S <sub>2</sub> R <sub>3</sub> S <sub>4</sub> R <sub>5</sub> R <sub>6</sub> S <sub>7</sub> R <sub>8</sub> S <sub>9</sub> S <sub>10</sub> S <sub>11</sub> S <sub>12</sub> |                                |
| Mengdou 14                                                                      | R <sub>1</sub> S <sub>2</sub> R <sub>3</sub> S <sub>4</sub> R <sub>5</sub> R <sub>6</sub> R <sub>7</sub> R <sub>8</sub> S <sub>9</sub> R <sub>10</sub> R <sub>11</sub> S <sub>12</sub> |                                |
| Suinong 41                                                                      | R <sub>1</sub> S <sub>2</sub> R <sub>3</sub> S <sub>4</sub> R <sub>5</sub> R <sub>6</sub> R <sub>7</sub> R <sub>8</sub> R <sub>9</sub> R <sub>10</sub> S <sub>11</sub> S <sub>12</sub> |                                |
| Suinong 29                                                                      | R <sub>1</sub> R <sub>2</sub> S <sub>3</sub> R <sub>4</sub> R <sub>5</sub> S <sub>6</sub> S <sub>7</sub> R <sub>8</sub> R <sub>9</sub> R <sub>10</sub> R <sub>11</sub> R <sub>12</sub> |                                |
| Suinong 35                                                                      | R <sub>1</sub> R <sub>2</sub> S <sub>3</sub> R <sub>4</sub> R <sub>5</sub> R <sub>6</sub> R <sub>7</sub> R <sub>8</sub> R <sub>9</sub> R <sub>10</sub> R <sub>11</sub> R <sub>12</sub> |                                |
| Mengdou 33                                                                      | R <sub>1</sub> S <sub>2</sub> R <sub>3</sub> S <sub>4</sub> R <sub>5</sub> R <sub>6</sub> R <sub>7</sub> R <sub>8</sub> S <sub>9</sub> R <sub>10</sub> S <sub>11</sub> S <sub>12</sub> |                                |
| Heihe 29                                                                        | R <sub>1</sub> S <sub>2</sub> R <sub>3</sub> S <sub>4</sub> R <sub>5</sub> R <sub>6</sub> R <sub>7</sub> R <sub>8</sub> R <sub>9</sub> S <sub>10</sub> S <sub>11</sub> R <sub>12</sub> |                                |
| Hefeng 44                                                                       | R <sub>1</sub> S <sub>2</sub> R <sub>3</sub> R <sub>4</sub> R <sub>5</sub> R <sub>6</sub> S <sub>7</sub> S <sub>8</sub> S <sub>9</sub> S <sub>10</sub> S <sub>11</sub> S <sub>12</sub> |                                |
| Fengshou 27                                                                     | R <sub>1</sub> S <sub>2</sub> R <sub>3</sub> R <sub>4</sub> R <sub>5</sub> R <sub>6</sub> S <sub>7</sub> R <sub>8</sub> S <sub>9</sub> S <sub>10</sub> R <sub>11</sub> R <sub>12</sub> |                                |
| Heihe 33                                                                        | R <sub>1</sub> S <sub>2</sub> R <sub>3</sub> R <sub>4</sub> R <sub>5</sub> R <sub>6</sub> S <sub>7</sub> R <sub>8</sub> R <sub>9</sub> S <sub>10</sub> S <sub>11</sub> R <sub>12</sub> |                                |
| Heihe 26                                                                        | R <sub>1</sub> S <sub>2</sub> R <sub>3</sub> R <sub>4</sub> R <sub>5</sub> R <sub>6</sub> S <sub>7</sub> R <sub>8</sub> S <sub>9</sub> R <sub>10</sub> S <sub>11</sub> S <sub>12</sub> |                                |
| Heinong 67                                                                      | R <sub>1</sub> S <sub>2</sub> R <sub>3</sub> R <sub>4</sub> R <sub>5</sub> R <sub>6</sub> S <sub>7</sub> R <sub>8</sub> S <sub>9</sub> S <sub>10</sub> S <sub>11</sub> S <sub>12</sub> |                                |
| Mengdou 15                                                                      | R <sub>1</sub> S <sub>2</sub> R <sub>3</sub> R <sub>4</sub> R <sub>5</sub> S <sub>6</sub> R <sub>7</sub> R <sub>8</sub> S <sub>9</sub> R <sub>10</sub> R <sub>11</sub> R <sub>12</sub> |                                |
| Mengdou 38, Mengdou 36                                                          | R <sub>1</sub> S <sub>2</sub> R <sub>3</sub> R <sub>4</sub> R <sub>5</sub> R <sub>6</sub> R <sub>7</sub> R <sub>8</sub> S <sub>9</sub> R <sub>10</sub> S <sub>11</sub> S <sub>12</sub> |                                |
| Mengdou 13, Mengdou 16,<br>Mengdou 30, Mengdou 34,<br>Mengdou 35 and Mengdou 26 | R <sub>1</sub> S <sub>2</sub> R <sub>3</sub> R <sub>4</sub> R <sub>5</sub> R <sub>6</sub> R <sub>7</sub> R <sub>8</sub> S <sub>9</sub> S <sub>10</sub> S <sub>11</sub> S <sub>12</sub> |                                |
| Dengke 3, Kejiao 07-584                                                         | R <sub>1</sub> S <sub>2</sub> R <sub>3</sub> R <sub>4</sub> R <sub>5</sub> R <sub>6</sub> R <sub>7</sub> R <sub>8</sub> S <sub>9</sub> R <sub>10</sub> R <sub>11</sub> R <sub>12</sub> |                                |
| Mengdou 9                                                                       | R <sub>1</sub> S <sub>2</sub> R <sub>3</sub> R <sub>4</sub> R <sub>5</sub> R <sub>6</sub> R <sub>7</sub> R <sub>8</sub> R <sub>9</sub> S <sub>10</sub> S <sub>11</sub> S <sub>12</sub> |                                |
| Suinong 22                                                                      | R <sub>1</sub> R <sub>2</sub> S <sub>3</sub> S <sub>4</sub> R <sub>5</sub> R <sub>6</sub> S <sub>7</sub> R <sub>8</sub> S <sub>9</sub> R <sub>10</sub> R <sub>11</sub> R <sub>12</sub> |                                |
| Suizhongzuo 40                                                                  | R <sub>1</sub> R <sub>2</sub> S <sub>3</sub> S <sub>4</sub> R <sub>5</sub> R <sub>6</sub> S <sub>7</sub> R <sub>8</sub> R <sub>9</sub> R <sub>10</sub> R <sub>11</sub> S <sub>12</sub> |                                |
| Dongnong 47                                                                     | R <sub>1</sub> R <sub>2</sub> S <sub>3</sub> S <sub>4</sub> R <sub>5</sub> R <sub>6</sub> S <sub>7</sub> R <sub>8</sub> S <sub>9</sub> S <sub>10</sub> S <sub>11</sub> S <sub>12</sub> |                                |
| Hefeng 46                                                                       | R <sub>1</sub> R <sub>2</sub> S <sub>3</sub> S <sub>4</sub> R <sub>5</sub> R <sub>6</sub> S <sub>7</sub> R <sub>8</sub> R <sub>9</sub> R <sub>10</sub> S <sub>11</sub> S <sub>12</sub> |                                |
| Suinong 27                                                                      | R <sub>1</sub> R <sub>2</sub> S <sub>3</sub> S <sub>4</sub> R <sub>5</sub> S <sub>6</sub> S <sub>7</sub> S <sub>8</sub> S <sub>9</sub> R <sub>10</sub> S <sub>11</sub> R <sub>12</sub> |                                |
| Fengshou 24                                                                     | R <sub>1</sub> R <sub>2</sub> S <sub>3</sub> S <sub>4</sub> R <sub>5</sub> S <sub>6</sub> S <sub>7</sub> R <sub>8</sub> R <sub>9</sub> S <sub>10</sub> S <sub>11</sub> S <sub>12</sub> |                                |
| Heihe 45                                                                        | R <sub>1</sub> R <sub>2</sub> S <sub>3</sub> S <sub>4</sub> R <sub>5</sub> S <sub>6</sub> S <sub>7</sub> R <sub>8</sub> S <sub>9</sub> S <sub>10</sub> S <sub>11</sub> S <sub>12</sub> |                                |
| Mengdou 32, Hefeng 41                                                           | R <sub>1</sub> R <sub>2</sub> S <sub>3</sub> R <sub>4</sub> S <sub>5</sub> R <sub>6</sub> S <sub>7</sub> R <sub>8</sub> S <sub>9</sub> R <sub>10</sub> S <sub>11</sub> R <sub>12</sub> |                                |
| Heihe 6                                                                         | R <sub>1</sub> R <sub>2</sub> S <sub>3</sub> S <sub>4</sub> R <sub>5</sub> S <sub>6</sub> S <sub>7</sub> R <sub>8</sub> R <sub>9</sub> R <sub>10</sub> S <sub>11</sub> R <sub>12</sub> |                                |
| Beidou 9                                                                        | S <sub>1</sub> S <sub>2</sub> R <sub>3</sub> R <sub>4</sub> S <sub>5</sub> R <sub>6</sub> R <sub>7</sub> R <sub>8</sub> S <sub>9</sub> S <sub>10</sub> S <sub>11</sub> S <sub>12</sub> |                                |
| Dengke 5                                                                        | R <sub>1</sub> R <sub>2</sub> S <sub>3</sub> R <sub>4</sub> R <sub>5</sub> S <sub>6</sub> S <sub>7</sub> S <sub>8</sub> S <sub>9</sub> S <sub>10</sub> R <sub>11</sub> S <sub>12</sub> |                                |
| Heinong 55                                                                      | R <sub>1</sub> R <sub>2</sub> S <sub>3</sub> R <sub>4</sub> S <sub>5</sub> R <sub>6</sub> S <sub>7</sub> S <sub>8</sub> S <sub>9</sub> S <sub>10</sub> R <sub>11</sub> R <sub>12</sub> |                                |
| Hefeng 50                                                                       | R <sub>1</sub> R <sub>2</sub> S <sub>3</sub> R <sub>4</sub> R <sub>5</sub> R <sub>6</sub> S <sub>7</sub> R <sub>8</sub> S <sub>9</sub> R <sub>10</sub> S <sub>11</sub> S <sub>12</sub> |                                |
| Heihe 18                                                                        | R <sub>1</sub> R <sub>2</sub> S <sub>3</sub> R <sub>4</sub> R <sub>5</sub> R <sub>6</sub> S <sub>7</sub> R <sub>8</sub> S <sub>9</sub> S <sub>10</sub> S <sub>11</sub> S <sub>12</sub> |                                |
| Henong 67, Suinong 33                                                           | R <sub>1</sub> R <sub>2</sub> S <sub>3</sub> R <sub>4</sub> R <sub>5</sub> R <sub>6</sub> S <sub>7</sub> R <sub>8</sub> S <sub>9</sub> R <sub>10</sub> R <sub>11</sub> R <sub>12</sub> |                                |
| Hefeng 48                                                                       | R <sub>1</sub> R <sub>2</sub> S <sub>3</sub> R <sub>4</sub> R <sub>5</sub> S <sub>6</sub> S <sub>7</sub> S <sub>8</sub> R <sub>9</sub> R <sub>10</sub> R <sub>11</sub> R <sub>12</sub> |                                |
| Neidou 4                                                                        | R <sub>1</sub> R <sub>2</sub> S <sub>3</sub> R <sub>4</sub> R <sub>5</sub> R <sub>6</sub> R <sub>7</sub> R <sub>8</sub> S <sub>9</sub> R <sub>10</sub> S <sub>11</sub> R <sub>12</sub> |                                |
| Suinong 36                                                                      | R <sub>1</sub> R <sub>2</sub> S <sub>3</sub> R <sub>4</sub> R <sub>5</sub> R <sub>6</sub> R <sub>7</sub> R <sub>8</sub> R <sub>9</sub> R <sub>10</sub> S <sub>11</sub> S <sub>12</sub> |                                |
| Kennong 5                                                                       | R <sub>1</sub> R <sub>2</sub> R <sub>3</sub> S <sub>4</sub> S <sub>5</sub> R <sub>6</sub> R <sub>7</sub> R <sub>8</sub> S <sub>9</sub> S <sub>10</sub> S <sub>11</sub> S <sub>12</sub> |                                |

**Table S1.** (Continued from previous page)

| Germplasm                                 | Reaction pattern                                                                                                                                                                       | Resistance gene ( <i>RPS</i> ) |
|-------------------------------------------|----------------------------------------------------------------------------------------------------------------------------------------------------------------------------------------|--------------------------------|
| Kejiao 08-952                             | R <sub>1</sub> R <sub>2</sub> R <sub>3</sub> S <sub>4</sub> R <sub>5</sub> R <sub>6</sub> S <sub>7</sub> R <sub>8</sub> S <sub>9</sub> R <sub>10</sub> R <sub>11</sub> S <sub>12</sub> |                                |
| Heinong 57                                | R <sub>1</sub> R <sub>2</sub> R <sub>3</sub> R <sub>4</sub> S <sub>5</sub> R <sub>6</sub> R <sub>7</sub> R <sub>8</sub> R <sub>9</sub> R <sub>10</sub> R <sub>11</sub> R <sub>12</sub> |                                |
| Hefeng 39                                 | R <sub>1</sub> R <sub>2</sub> R <sub>3</sub> R <sub>4</sub> R <sub>5</sub> S <sub>6</sub> S <sub>7</sub> R <sub>8</sub> S <sub>9</sub> R <sub>10</sub> R <sub>11</sub> R <sub>12</sub> |                                |
| Dengke 9                                  | R <sub>1</sub> R <sub>2</sub> R <sub>3</sub> R <sub>4</sub> S <sub>5</sub> R <sub>6</sub> R <sub>7</sub> R <sub>8</sub> S <sub>9</sub> R <sub>10</sub> S <sub>11</sub> S <sub>12</sub> |                                |
| Suinong 21                                | R <sub>1</sub> R <sub>2</sub> S <sub>3</sub> R <sub>4</sub> S <sub>5</sub> S <sub>6</sub> S <sub>7</sub> S <sub>8</sub> S <sub>9</sub> R <sub>10</sub> R <sub>11</sub> R <sub>12</sub> |                                |
| Heihe 48, Dengke 6                        | R <sub>1</sub> R <sub>2</sub> R <sub>3</sub> R <sub>4</sub> R <sub>5</sub> R <sub>6</sub> S <sub>7</sub> R <sub>8</sub> S <sub>9</sub> S <sub>10</sub> S <sub>11</sub> S <sub>12</sub> |                                |
| Fengshou 23                               | R <sub>1</sub> R <sub>2</sub> R <sub>3</sub> R <sub>4</sub> R <sub>5</sub> R <sub>6</sub> S <sub>7</sub> R <sub>8</sub> R <sub>9</sub> R <sub>10</sub> S <sub>11</sub> S <sub>12</sub> |                                |
| Suinong 32, Henong 75                     | R <sub>1</sub> R <sub>2</sub> R <sub>3</sub> R <sub>4</sub> R <sub>5</sub> R <sub>6</sub> S <sub>7</sub> R <sub>8</sub> S <sub>9</sub> R <sub>10</sub> R <sub>11</sub> R <sub>12</sub> |                                |
| Mengdou 37, Kejiao 10-2333 and Mengdou 11 | R <sub>1</sub> R <sub>2</sub> R <sub>3</sub> R <sub>4</sub> R <sub>5</sub> R <sub>6</sub> S <sub>7</sub> R <sub>8</sub> S <sub>9</sub> S <sub>10</sub> S <sub>11</sub> R <sub>12</sub> |                                |
| Jiyu 35                                   | R <sub>1</sub> R <sub>2</sub> R <sub>3</sub> R <sub>4</sub> S <sub>5</sub> R <sub>6</sub> S <sub>7</sub> R <sub>8</sub> R <sub>9</sub> R <sub>10</sub> R <sub>11</sub> R <sub>12</sub> |                                |
| Heihe 50                                  | R <sub>1</sub> R <sub>2</sub> R <sub>3</sub> R <sub>4</sub> R <sub>5</sub> R <sub>6</sub> R <sub>7</sub> S <sub>8</sub> S <sub>9</sub> S <sub>10</sub> S <sub>11</sub> S <sub>12</sub> |                                |
| Keshan 1                                  | R <sub>1</sub> R <sub>2</sub> R <sub>3</sub> R <sub>4</sub> R <sub>5</sub> R <sub>6</sub> R <sub>7</sub> R <sub>8</sub> S <sub>9</sub> S <sub>10</sub> S <sub>11</sub> S <sub>12</sub> |                                |
| Suinong 26                                | R <sub>1</sub> R <sub>2</sub> S <sub>3</sub> R <sub>4</sub> S <sub>5</sub> R <sub>6</sub> S <sub>7</sub> S <sub>8</sub> S <sub>9</sub> R <sub>10</sub> S <sub>11</sub> S <sub>12</sub> |                                |
| Beidou 48                                 | R <sub>1</sub> R <sub>2</sub> R <sub>3</sub> R <sub>4</sub> R <sub>5</sub> R <sub>6</sub> R <sub>7</sub> R <sub>8</sub> R <sub>9</sub> R <sub>10</sub> S <sub>11</sub> S <sub>12</sub> |                                |

Note: <sup>1</sup>race 1, <sup>2</sup>race 3, <sup>3</sup>race 4, <sup>4</sup>race 5, <sup>5</sup>race 9, <sup>6</sup>race 13, <sup>7</sup>race 44, <sup>8</sup>race 54, <sup>9</sup>PsJS2, <sup>10</sup>PsMC1, <sup>11</sup>Ps41-1, <sup>12</sup>USAR2.

**Table S2.** Evaluation of soybean germplasm with partial resistance to *P. sojae* strains using inoculum layer method

[illegible]

**Table S2.** (Continued from previous page)

| Germplasm  | Disease index (DI) <sup>z</sup> |       |       |       |       |        |        |        |       |       |        |       |       |
|------------|---------------------------------|-------|-------|-------|-------|--------|--------|--------|-------|-------|--------|-------|-------|
|            | race1                           | race3 | race4 | race5 | race9 | race13 | race44 | race54 | PsJs2 | PsMC1 | Ps41-1 | USAR2 | Mean  |
| Heinong 58 | 51.11                           | 53.48 | 52.22 | 53.33 | 82.22 | —      | —      | —      | —     | —     | 78.61  | 67.90 | 62.70 |
| Heinong 59 | —                               | 58.36 | 48.70 | 46.11 | —     | 80.22  | 68.44  | —      | 45.30 | —     | 53.70  | 40.17 | 55.13 |
| Heinong 67 | —                               | 23.46 | —     | —     | —     | —      | 30.29  | —      | 68.77 | 47.89 | 46.48  | 11.11 | 38.00 |
| Hefeng 35  | —                               | 16.67 | 12.91 | —     | —     | —      | 48.26  | 13.40  | 61.46 | 86.90 | 32.10  | 16.72 | 36.05 |
| Hefeng 37  | 47.53                           | 43.09 | 71.97 | 86.90 | 30.09 | 33.33  | 43.52  | 71.60  | —     | 18.52 | 38.52  | 56.94 | 49.27 |
| Hefeng 39  | —                               | —     | —     | —     | —     | 70.16  | 54.32  | —      | 61.47 | —     | —      | —     | 61.98 |
| Hefeng 41  | —                               | —     | 41.73 | —     | 58.99 | —      | 57.87  | —      | 41.59 | —     | 29.28  | —     | 45.89 |
| Hefeng 44  | —                               | 25.51 | —     | —     | —     | —      | 81.75  | 59.54  | 36.42 | 27.88 | 59.72  | 22.22 | 44.72 |
| Hefeng 45  | 40.95                           | 14.91 | —     | 55.56 | 50.95 | —      | —      | 28.52  | 50.40 | 37.65 | 69.14  | 45.91 | 43.78 |
| Hefeng 46  | —                               | —     | 16.42 | 39.11 | —     | —      | 13.42  | —      | —     | —     | 26.79  | 38.62 | 26.87 |
| Hefeng 48  | —                               | —     | 82.55 | —     | —     | 29.26  | 31.75  | 41.93  | —     | —     | —      | —     | 46.37 |
| Hefeng 50  | —                               | —     | 36.63 | —     | —     | —      | 69.18  | —      | 36.67 | —     | 42.96  | 27.78 | 42.64 |
| Hefeng 51  | 38.78                           | 26.30 | 67.42 | 62.72 | 62.24 | 31.85  | 35.24  | 15.93  | —     | 20.99 | 52.10  | 41.21 | 41.34 |
| Hefeng 52  | —                               | 19.38 | —     | —     | —     | 13.83  | —      | —      | —     | 17.18 | 12.35  | 16.87 | 15.92 |
| Hefeng 54  | 23.05                           | —     | 47.22 | 48.77 | —     | 19.29  | 55.40  | 19.29  | 26.85 | 43.52 | 37.57  | 37.37 | 35.83 |
| Hefeng 55  | 41.72                           | 25.19 | —     | 84.44 | 62.47 | 21.77  | 62.22  | —      | 24.07 | 21.10 | 37.04  | 14.44 | 39.45 |
| Suinong 14 | —                               | 30.68 | 34.52 | 55.09 | 13.23 | —      | 25.68  | —      | 17.92 | —     | 24.07  | 66.01 | 33.40 |
| Suinong 21 | —                               | —     | 21.11 | —     | 78.89 | 13.33  | 38.15  | 14.81  | 67.48 | —     | —      | —     | 38.96 |
| Suinong 22 | —                               | —     | 32.61 | 32.06 | —     | —      | 59.54  | —      | 43.27 | —     | —      | —     | 41.87 |
| Suinong 23 | 20.16                           | 18.31 | 46.50 | 22.22 | 59.54 | 74.73  | —      | —      | 42.80 | —     | —      | —     | 40.61 |

**Table S2.** (Continued from previous page)

| Germplasm      | Disease index (DI) <sup>z</sup> |       |       |       |       |        |        |        |       |       |        |       |       |
|----------------|---------------------------------|-------|-------|-------|-------|--------|--------|--------|-------|-------|--------|-------|-------|
|                | race1                           | race3 | race4 | race5 | race9 | race13 | race44 | race54 | PsJs2 | PsMC1 | Ps41-1 | USAR2 | Mean  |
| Suinong 24     | —                               | 33.37 | —     | 65.15 | —     | 22.55  | 21.73  | 36.63  | 74.92 | 24.07 | 51.09  | 30.74 | 40.03 |
| Suinong 25     | 11.11                           | —     | 41.73 | 22.22 | —     | 71.06  | 57.87  | —      | 41.59 | —     | 29.81  | 23.05 | 37.31 |
| Suinong 26     | —                               | —     | 14.89 | —     | 17.28 | —      | 83.70  | 40.10  | 48.40 | —     | 24.34  | 13.82 | 34.65 |
| Suinong 27     | —                               | —     | 15.24 | 11.11 | —     | 16.05  | 22.91  | 27.04  | 17.07 | —     | 61.48  | —     | 24.41 |
| Suinong 28     | 16.67                           | 16.93 | 16.91 | 52.72 | 11.11 | 29.45  | 12.26  | 15.94  | 41.41 | 30.97 | 79.37  | 41.98 | 30.48 |
| Suinong 29     | —                               | —     | 18.91 | —     | —     | 31.11  | 26.30  | —      | —     | —     | —      | —     | 25.44 |
| Suinong 31     | —                               | 22.63 | 52.98 | 42.22 | —     | —      | 26.67  | —      | —     | 24.81 | 67.90  | 12.96 | 35.74 |
| Suinong 32     | —                               | —     | —     | —     | —     | —      | 70.99  | —      | 42.96 | —     | —      | —     | 56.98 |
| Suinong 33     | —                               | —     | 79.01 | —     | —     | —      | 28.77  | —      | 23.99 | —     | —      | —     | 43.92 |
| Suinong 35     | —                               | —     | 19.71 | —     | —     | —      | —      | —      | —     | —     | —      | —     | 19.71 |
| Suinong 36     | —                               | —     | 38.12 | —     | —     | —      | —      | —      | —     | —     | 61.19  | 32.51 | 43.94 |
| Suinong 37     | —                               | 24.39 | 80.32 | 46.60 | —     | —      | —      | —      | —     | 18.83 | 77.41  | 18.64 | 44.37 |
| Suinong 38     | —                               | 15.72 | 21.44 | 16.75 | —     | 24.54  | 22.22  | —      | —     | —     | 60.13  | 17.06 | 25.41 |
| Suizhongzuo 40 | —                               | —     | 36.78 | 19.64 | —     | —      | 27.78  | —      | —     | —     | —      | 14.20 | 24.60 |
| Suinong 41     | —                               | 22.55 | —     | 16.87 | —     | —      | —      | —      | —     | —     | 76.79  | 11.93 | 32.04 |
| Keshan 1       | —                               | —     | —     | —     | —     | —      | —      | —      | 11.93 | 21.56 | 25.93  | 47.90 | 31.04 |
| Kejiao 07-584  | —                               | 50.18 | —     | —     | —     | —      | —      | —      | 53.43 | —     | —      | —     | 51.81 |
| Kejiao 08-952  | —                               | —     | —     | 11.11 | —     | —      | 61.47  | —      | 42.39 | —     | —      | 41.45 | 39.11 |
| Kejiao 10-2192 | —                               | 38.13 | 11.11 | —     | —     | —      | —      | —      | 26.35 | —     | 56.54  | 45.93 | 35.61 |
| Kejiao 10-2333 | —                               | —     | —     | —     | —     | —      | 70.16  | —      | 37.64 | 11.11 | 59.26  | —     | 44.54 |

**Table S2.** (Continued from previous page)

| Germplasm     | Disease index (DI) <sup>z</sup> |       |       |       |       |        |        |        |       |       |        |       |       |
|---------------|---------------------------------|-------|-------|-------|-------|--------|--------|--------|-------|-------|--------|-------|-------|
|               | race1                           | race3 | race4 | race5 | race9 | race13 | race44 | race54 | PsJs2 | PsMC1 | Ps41-1 | USAR2 | Mean  |
| Kejiao 10-262 | —                               | —     | —     | —     | —     | —      | —      | —      | 26.33 | —     | —      | —     | 26.33 |
| Beidou 9      | 19.54                           | 18.52 | —     | —     | 11.11 | —      | —      | —      | 39.88 | 46.43 | 43.62  | 41.67 | 31.54 |
| Beidou 42     | 11.11                           | —     | —     | 11.11 | —     | —      | 37.10  | —      | —     | 51.39 | —      | —     | 27.68 |
| Beidou 48     | —                               | —     | —     | —     | —     | —      | —      | —      | —     | —     | 66.85  | 34.92 | 50.89 |
| Beifeng 11    | 17.06                           | —     | 11.11 | —     | —     | —      | —      | —      | 76.19 | —     | —      | 46.60 | 37.74 |
| Fengshou 23   | —                               | —     | —     | —     | —     | —      | 13.40  | —      | —     | —     | 47.89  | 40.49 | 33.93 |
| Fengshou 24   | —                               | —     | 29.63 | 22.22 | —     | 73.54  | 16.54  | —      | —     | 37.10 | 49.38  | 11.11 | 34.22 |
| Fengshou 27   | —                               | 14.79 | —     | —     | —     | —      | 13.40  | —      | 40.12 | 70.16 | —      | —     | 34.62 |
| Dongnong 4400 | 21.07                           | 14.92 | 13.84 | 71.09 | 13.27 | 63.46  | 54.07  | 15.48  | —     | —     | 56.79  | 39.47 | 36.35 |
| Heihe 4       | —                               | 12.41 | 14.57 | 12.96 | —     | 24.75  | —      | —      | 44.53 | —     | 55.11  | —     | 27.39 |
| Heihe 6       | —                               | —     | 33.80 | 30.48 | —     | 71.43  | 20.41  | —      | —     | —     | 14.51  | —     | 34.13 |
| Dongnong 47   | —                               | —     | 13.39 | 77.78 | —     | —      | 23.33  | —      | 19.26 | 76.95 | 18.40  | 38.44 | 38.22 |
| Heihe 18      | —                               | —     | 12.70 | —     | —     | —      | 56.91  | —      | 12.04 | 29.20 | 74.63  | 32.10 | 36.26 |
| Heihe 22      | —                               | 16.67 | —     | 36.42 | —     | —      | 48.26  | —      | 61.46 | 86.90 | 32.10  | 16.72 | 42.65 |
| Heihe 26      | —                               | 17.28 | —     | —     | —     | —      | 53.92  | —      | 65.28 | —     | 55.97  | 50.85 | 48.66 |
| Heihe 27      | 55.56                           | 39.86 | —     | —     | 30.30 | 37.57  | 37.10  | —      | —     | —     | 65.61  | 11.85 | 39.69 |
| Heihe 29      | —                               | 13.24 | —     | 28.89 | —     | —      | —      | —      | —     | 34.81 | 42.46  | —     | 29.85 |
| Heihe 33      | —                               | 21.14 | —     | —     | —     | —      | 13.42  | —      | —     | 61.47 | 26.79  | —     | 30.71 |
| Heihe 35      | 38.07                           | 12.41 | 14.57 | 12.96 | 12.35 | —      | 34.39  | —      | 44.53 | 28.50 | 55.11  | 14.35 | 26.72 |
| Heihe 36      | —                               | 21.14 | 16.42 | 43.83 | —     | —      | 13.42  | —      | 70.16 | —     | 26.79  | 38.62 | 32.91 |

**Table S2.** (Continued from previous page)

| Germplasm  | Disease index (DI) <sup>z</sup> |       |       |       |       |        |        |        |       |       |        |       |       |
|------------|---------------------------------|-------|-------|-------|-------|--------|--------|--------|-------|-------|--------|-------|-------|
|            | race1                           | race3 | race4 | race5 | race9 | race13 | race44 | race54 | PsJs2 | PsMC1 | Ps41-1 | USAR2 | Mean  |
| Heihe 43   | —                               | 24.26 | 22.10 | 34.60 | —     | —      | 39.54  | —      | 41.98 | 18.88 | 19.07  | 35.65 | 29.51 |
| Heihe 45   | —                               | —     | 63.81 | 54.91 | —     | 35.31  | 55.09  | —      | 49.17 | 15.66 | 79.20  | 12.70 | 45.73 |
| Heihe 48   | —                               | —     | —     | —     | —     | —      | 27.18  | —      | 27.74 | 16.14 | 44.75  | 22.22 | 27.61 |
| Heihe 50   | —                               | —     | —     | —     | —     | —      | —      | 37.04  | 70.90 | 70.16 | 62.88  | 11.11 | 50.42 |
| Heihe 52   | 38.14                           | 23.10 | 20.78 | 55.40 | —     | 51.85  | 24.41  | 11.11  | —     | —     | 17.39  | 20.06 | 29.14 |
| Heihe 53   | —                               | 31.57 | 51.59 | 48.61 | —     | —      | 40.93  | —      | —     | —     | 55.09  | 18.52 | 41.05 |
| Neidou 4   | —                               | —     | 13.76 | —     | —     | —      | —      | —      | 15.59 | —     | 52.34  | —     | 33.05 |
| Mengdou 9  | —                               | 13.89 | —     | —     | —     | —      | —      | —      | —     | 31.69 | 11.11  | 44.03 | 25.18 |
| Mengdou 11 | —                               | —     | —     | —     | —     | —      | 22.91  | —      | 17.07 | 16.67 | 61.48  | —     | 18.88 |
| Mengdou 12 | 24.24                           | 23.05 | —     | 18.27 | —     | 17.05  | 65.07  | 20.97  | 14.71 | 22.09 | 17.20  | 46.16 | 26.88 |
| Mengdou 13 | —                               | 45.47 | —     | —     | —     | —      | —      | —      | 29.73 | 19.36 | 11.11  | 11.11 | 23.36 |
| Mengdou 14 | —                               | 20.33 | —     | 36.73 | —     | —      | —      | —      | 24.94 | —     | —      | 13.43 | 23.86 |
| Mengdou 15 | —                               | 19.91 | —     | —     | —     | 65.61  | —      | —      | 37.10 | —     | —      | —     | 40.87 |
| Mengdou 16 | —                               | 39.51 | —     | —     | —     | —      | —      | —      | 54.06 | 59.01 | 61.47  | 25.99 | 48.01 |
| Mengdou 26 | —                               | 11.11 | —     | —     | —     | —      | —      | —      | 78.71 | 38.89 | 11.93  | 31.57 | 34.44 |
| Mengdou 28 | —                               | —     | —     | —     | —     | —      | —      | —      | 16.72 | —     | —      | —     | 16.72 |
| Mengdou 30 | —                               | 38.35 | —     | —     | —     | —      | —      | —      | 56.48 | 57.30 | 54.94  | 44.81 | 50.38 |
| Mengdou 31 | 21.69                           | —     | —     | 59.55 | —     | 51.65  | 35.65  | 40.14  | 54.50 | 37.59 | 61.47  | 33.13 | 43.93 |
| Mengdou 32 | —                               | —     | 11.85 | —     | 16.84 | —      | 11.85  | —      | 17.49 | —     | 43.38  | —     | 20.28 |
| Mengdou 33 | —                               | 15.28 | —     | 16.20 | —     | —      | —      | —      | 14.66 | —     | 34.07  | 35.01 | 23.04 |

**Table S2.** (Continued from previous page)

| Germplasm     | Disease index (DI) <sup>Z</sup> |       |       |       |       |        |        |        |       |       |        |       |       |
|---------------|---------------------------------|-------|-------|-------|-------|--------|--------|--------|-------|-------|--------|-------|-------|
|               | race1                           | race3 | race4 | race5 | race9 | race13 | race44 | race54 | PsJs2 | PsMC1 | Ps41-1 | USAR2 | Mean  |
| Mengdou 34    | —                               | 42.06 | —     | —     | —     | —      | —      | —      | 16.72 | 53.54 | 54.94  | 31.48 | 39.75 |
| Mengdou 35    | —                               | 17.16 | —     | —     | —     | —      | —      | —      | 30.26 | 31.79 | 26.19  | 22.93 | 25.67 |
| Mengdou 36    | —                               | 26.70 | —     | —     | —     | —      | —      | —      | 61.47 | —     | 16.72  | 18.52 | 30.85 |
| Mengdou 37    | —                               | —     | —     | —     | —     | —      | 15.56  | —      | 25.39 | 28.57 | 43.80  | —     | 28.33 |
| Mengdou 38    | —                               | 18.52 | —     | —     | —     | —      | —      | —      | 61.01 | —     | 24.94  | 11.11 | 28.90 |
| Dengke 1      | —                               | 37.04 | —     | —     | —     | —      | —      | —      | —     | —     | 37.10  | 15.41 | 29.85 |
| Dengke 3      | —                               | 11.11 | —     | —     | —     | —      | —      | —      | 54.94 | —     | —      | —     | 33.03 |
| Dengke 4      | —                               | —     | —     | —     | —     | 13.58  | —      | —      | —     | —     | —      | —     | 13.58 |
| Dengke 5      | —                               | —     | 42.86 | —     | —     | 61.06  | 34.20  | 49.85  | 34.17 | 45.30 | —      | 31.90 | 42.76 |
| Dengke 6      | —                               | —     | —     | —     | —     | —      | 20.99  | —      | 19.71 | 30.55 | 59.16  | 12.96 | 28.67 |
| Dengke 9      | —                               | —     | —     | —     | 11.11 | —      | —      | —      | 32.61 | —     | 33.98  | 34.36 | 28.02 |
| Dengke 10     | —                               | 23.10 | 20.78 | —     | —     | —      | 24.41  | 11.11  | —     | —     | —      | —     | 19.85 |
| Henong 60     | 42.22                           | 40.00 | 41.30 | 39.51 | 60.00 | 25.56  | 69.49  | 86.90  | 79.38 | 49.55 | 78.89  | 61.23 | 56.17 |
| Henong 67     | —                               | —     | 46.30 | —     | —     | —      | 26.76  | —      | 23.23 | —     | —      | —     | 32.10 |
| Henong 75     | —                               | —     | —     | —     | —     | —      | 27.88  | —      | 50.58 | —     | —      | —     | 39.23 |
| Kenfeng 16    | 34.81                           | 19.63 | 38.93 | 24.53 | —     | —      | 31.67  | —      | —     | 17.04 | 52.37  | 12.96 | 28.99 |
| Kendou 6      | 42.59                           | 20.37 | 57.05 | 17.70 | 13.24 | 24.60  | 29.75  | 26.91  | —     | —     | 60.82  | 14.63 | 30.77 |
| Kenjiandou 28 | —                               | 44.44 | 15.19 | 17.72 | —     | —      | 59.94  | —      | —     | 45.93 | 86.73  | 29.63 | 42.80 |
| Kenfeng 22    | —                               | 25.68 | —     | 41.45 | —     | —      | 38.07  | —      | 78.80 | 24.94 | 29.17  | 11.11 | 35.60 |
| Kennong 5     | —                               | —     | —     | 11.11 | 56.91 | —      | —      | —      | 35.21 | 29.63 | 41.42  | 11.11 | 30.90 |
| Jiyu 35       | —                               | —     | —     | —     | 30.00 | —      | 16.52  | —      | —     | —     | —      | —     | 23.26 |



**Table S2.** (Continued from previous page)

| Germplasm  | Disease index (DI) <sup>Z</sup> |       |       |       |       |        |        |        |       |       |        |       |       |
|------------|---------------------------------|-------|-------|-------|-------|--------|--------|--------|-------|-------|--------|-------|-------|
|            | race1                           | race3 | race4 | race5 | race9 | race13 | race44 | race54 | PsJs2 | PsMC1 | Ps41-1 | USAR2 | Mean  |
| Jiyu 97    | 21.23                           | 72.35 | 84.10 | 81.75 | 56.30 | —      | 37.04  | —      | 32.04 | —     | 61.30  | 20.52 | 51.85 |
| Hongfeng 3 | —                               | 13.22 | 50.91 | —     | —     | 12.96  | 24.85  | —      | 31.16 | 38.02 | 39.14  | —     | 30.04 |

Note: <sup>Z</sup> Values are the average of three experiments. '—' =Once a germplasm was identified as resistance to *P. sojae* strains in hypocotyl inoculation test, the germplasm was not evaluated for partial resistance. The grey part of the table shows soybean cultivars with high partial resistance.

**Table S3.** Comparison of partial resistance evaluation of randomly selected races inoculated by inoculum layer method and radicle inoculation method

| Germplasm  | Disease index (DI) <sup>Z</sup> |       |        |       |        |       |
|------------|---------------------------------|-------|--------|-------|--------|-------|
|            | race1                           |       | race13 |       | race54 |       |
|            | ILM                             | RIM   | ILM    | RIM   | ILM    | RIM   |
| Heinong 37 | —                               | —     | —      | —     | —      | —     |
| Heinong 46 | 75.06                           | 68.15 | —      | —     | —      | —     |
| Heinong 51 | —                               | —     | —      | —     | —      | —     |
| Heinong 52 | —                               | —     | 58.99  | 49.63 | 68.75  | 57.78 |
| Heinong 53 | 41.73                           | 28.89 | —      | —     | 45.37  | 20.00 |
| Heinong 54 | —                               | —     | —      | —     | —      | —     |
| Heinong 55 | —                               | —     | —      | —     | 39.63  | 30.37 |
| Heinong 56 | 43.62                           | 32.59 | —      | —     | —      | —     |
| Heinong 57 | —                               | —     | —      | —     | —      | —     |
| Heinong 58 | 51.11                           | 45.19 | —      | —     | —      | —     |
| Heinong 59 | —                               | —     | 80.22  | 68.89 | —      | —     |
| Heinong 67 | —                               | —     | —      | —     | —      | —     |
| Hefeng 35  | —                               | —     | —      | —     | 13.40  | 1.48  |
| Hefeng 37  | 47.53                           | 33.33 | 33.33  | 24.45 | 71.60  | 69.63 |
| Hefeng 39  | —                               | —     | 70.16  | 59.26 | —      | —     |
| Hefeng 41  | —                               | —     | —      | —     | —      | —     |
| Hefeng 44  | —                               | —     | —      | —     | 59.54  | 45.19 |
| Hefeng 45  | 40.95                           | 25.19 | —      | —     | 28.52  | 14.08 |
| Hefeng 46  | —                               | —     | —      | —     | —      | —     |
| Hefeng 48  | —                               | —     | 29.26  | 14.82 | 41.93  | 19.26 |
| Hefeng 50  | —                               | —     | —      | —     | —      | —     |
| Hefeng 51  | 38.78                           | 22.22 | 31.85  | 17.04 | 15.93  | 11.11 |
| Hefeng 52  | —                               | —     | 13.83  | 1.48  | —      | —     |

**Table S3.** (Continued from previous page)

| Germplasm      | Disease index (DI) <sup>Z</sup> |       |        |       |        |       |
|----------------|---------------------------------|-------|--------|-------|--------|-------|
|                | race1                           |       | race13 |       | race54 |       |
|                | ILM                             | RIM   | ILM    | RIM   | ILM    | RIM   |
| Hefeng 54      | 23.05                           | 11.11 | 19.29  | 7.41  | 19.29  | 6.67  |
| Hefeng 55      | 41.72                           | 27.42 | 21.77  | 12.59 | —      | —     |
| Suinong 14     | —                               | —     | —      | —     | —      | —     |
| Suinong 21     | —                               | —     | 13.33  | 0.74  | 14.81  | 11.11 |
| Suinong 22     | —                               | —     | —      | —     | —      | —     |
| Suinong 23     | 20.16                           | 11.11 | 74.73  | 62.96 | —      | —     |
| Suinong 24     | —                               | —     | 22.55  | 9.63  | 36.63  | 15.56 |
| Suinong 25     | 11.11                           | 0.00  | 71.06  | 57.04 | —      | —     |
| Suinong 26     | —                               | —     | —      | —     | 40.10  | 27.41 |
| Suinong 27     | —                               | —     | 16.05  | 6.67  | 27.04  | 15.56 |
| Suinong 28     | 16.67                           | 9.63  | 29.45  | 3.70  | 15.94  | 34.82 |
| Suinong 29     | —                               | —     | 31.11  | 20.00 | —      | —     |
| Suinong 31     | —                               | —     | —      | —     | —      | —     |
| Suinong 32     | —                               | —     | —      | —     | —      | —     |
| Suinong 33     | —                               | —     | —      | —     | —      | —     |
| Suinong 35     | —                               | —     | —      | —     | —      | —     |
| Suinong 36     | —                               | —     | —      | —     | —      | —     |
| Suinong 37     | —                               | —     | —      | —     | —      | —     |
| Suinong 38     | —                               | —     | 24.54  | 17.04 | —      | —     |
| Suizhongzuo 40 | —                               | —     | —      | —     | —      | —     |
| Suinong 41     | —                               | —     | —      | —     | —      | —     |
| Keshan 1       | —                               | —     | —      | —     | —      | —     |
| Kejiao 07-584  | —                               | —     | —      | —     | —      | —     |
| Kejiao 08-952  | —                               | —     | —      | —     | —      | —     |
| Kejiao 10-2192 | —                               | —     | —      | —     | —      | —     |
| Kejiao 10-2333 | —                               | —     | —      | —     | —      | —     |
| Kejiao 10-262  | —                               | —     | —      | —     | —      | —     |
| Beidou 9       | 19.54                           | 2.22  | —      | —     | —      | —     |
| Beidou 42      | 11.11                           | 20.00 | —      | —     | —      | —     |
| Beidou 48      | —                               | —     | —      | —     | —      | —     |
| Beifeng 11     | 17.06                           | 0.00  | —      | —     | —      | —     |
| Fengshou 23    | —                               | —     | —      | —     | —      | —     |
| Fengshou 24    | —                               | —     | 73.54  | 60.00 | —      | —     |
| Fengshou 27    | —                               | —     | —      | —     | —      | —     |
| Dongnong 4400  | 21.07                           | 12.59 | 63.46  | 47.21 | 15.48  | 4.45  |
| Heihe 4        | —                               | —     | 24.75  | 16.30 | —      | —     |

**Table S3.** (Continued from previous page)

| Germplasm   | Disease index (DI) <sup>Z</sup> |       |        |       |        |       |
|-------------|---------------------------------|-------|--------|-------|--------|-------|
|             | race1                           |       | race13 |       | race54 |       |
|             | ILM                             | RIM   | ILM    | RIM   | ILM    | RIM   |
| Heihe 6     | —                               | —     | 71.43  | 68.15 | —      | —     |
| Dongnong 47 | —                               | —     | —      | —     | —      | —     |
| Heihe 18    | —                               | —     | —      | —     | —      | —     |
| Heihe 22    | —                               | —     | —      | —     | —      | —     |
| Heihe 26    | —                               | —     | —      | —     | —      | —     |
| Heihe 27    | 55.56                           | 20.00 | 37.57  | 40.74 | —      | —     |
| Heihe 29    | —                               | —     | —      | —     | —      | —     |
| Heihe 33    | —                               | —     | —      | —     | —      | —     |
| Heihe 35    | 38.07                           | 23.70 | —      | —     | —      | —     |
| Heihe 36    | —                               | —     | —      | —     | —      | —     |
| Heihe 43    | —                               | —     | —      | —     | —      | —     |
| Heihe 45    | —                               | —     | 35.31  | 23.70 | —      | —     |
| Heihe 48    | —                               | —     | —      | —     | —      | —     |
| Heihe 50    | —                               | —     | —      | —     | 37.04  | 2.22  |
| Heihe 52    | 38.14                           | 31.85 | 51.85  | 40.74 | 11.11  | 2.22  |
| Heihe 53    | —                               | —     | —      | —     | —      | —     |
| Neidou 4    | —                               | —     | —      | —     | —      | —     |
| Mengdou 9   | —                               | —     | —      | —     | —      | —     |
| Mengdou 11  | —                               | —     | —      | —     | —      | —     |
| Mengdou 12  | 24.24                           | 11.11 | 17.05  | 3.70  | 20.97  | 8.89  |
| Mengdou 13  | —                               | —     | —      | —     | —      | —     |
| Mengdou 14  | —                               | —     | —      | —     | —      | —     |
| Mengdou 15  | —                               | —     | 65.61  | 2.96  | —      | —     |
| Mengdou 16  | —                               | —     | —      | —     | —      | —     |
| Mengdou 26  | —                               | —     | —      | —     | —      | —     |
| Mengdou 28  | —                               | —     | —      | —     | —      | —     |
| Mengdou 30  | —                               | —     | —      | —     | —      | —     |
| Mengdou 31  | 21.69                           | 10.37 | 51.65  | 22.96 | 40.14  | 23.70 |
| Mengdou 32  | —                               | —     | —      | —     | —      | —     |
| Mengdou 33  | —                               | —     | —      | —     | —      | —     |
| Mengdou 34  | —                               | —     | —      | —     | —      | —     |
| Mengdou 35  | —                               | —     | —      | —     | —      | —     |
| Mengdou 36  | —                               | —     | —      | —     | —      | —     |
| Mengdou 37  | —                               | —     | —      | —     | —      | —     |
| Mengdou 38  | —                               | —     | —      | —     | —      | —     |
| Dengke 1    | —                               | —     | —      | —     | —      | —     |

**Table S3.** (Continued from previous page)

| Germplasm     | Disease index (DI) <sup>Z</sup> |       |        |       |        |       |
|---------------|---------------------------------|-------|--------|-------|--------|-------|
|               | race1                           |       | race13 |       | race54 |       |
|               | ILM                             | RIM   | ILM    | RIM   | ILM    | RIM   |
| Dengke 3      | —                               | —     | —      | —     | —      | —     |
| Dengke 4      | —                               | —     | 13.58  | 1.48  | —      | —     |
| Dengke 5      | —                               | —     | 61.06  | 20.00 | 49.85  | 39.26 |
| Dengke 6      | —                               | —     | —      | —     | —      | —     |
| Dengke 9      | —                               | —     | —      | —     | —      | —     |
| Dengke 10     | —                               | —     | —      | —     | 11.11  | 4.45  |
| Henong 60     | 42.22                           | 33.33 | 25.56  | 12.59 | 86.90  | 75.56 |
| Henong 67     | —                               | —     | —      | —     | —      | —     |
| Henong 75     | —                               | —     | —      | —     | —      | —     |
| Kenfeng 16    | 34.81                           | 22.96 | —      | —     | —      | —     |
| Kendou 6      | 42.59                           | 25.19 | 24.60  | 21.48 | 26.91  | 14.08 |
| Kenjiandou 28 | —                               | —     | —      | —     | —      | —     |
| Kenfeng 22    | —                               | —     | —      | —     | —      | —     |
| Kennong 5     | —                               | —     | —      | —     | —      | —     |
| Jiyu 35       | —                               | —     | —      | —     | —      | —     |
| Jiyu 97       | 21.23                           | 8.89  | —      | —     | —      | —     |
| Hongfeng 3    | —                               | —     | 12.96  | 0.00  | —      | —     |

Note: <sup>Z</sup> Values are the average of three experiments. '—' =Once a germplasm was identified as resistance to *P. sojae* strains in hypocotyl inoculation test, the germplasm was not evaluated for partial resistance. ILM, Inoculum Layer Method; RIM, Radicle Inoculation Method. The grey part of the table shows the same level of partial resistance to *P. sojae*.
